# Supplementary material
Source: PubMed Central journal article supplement (PMC3595481)

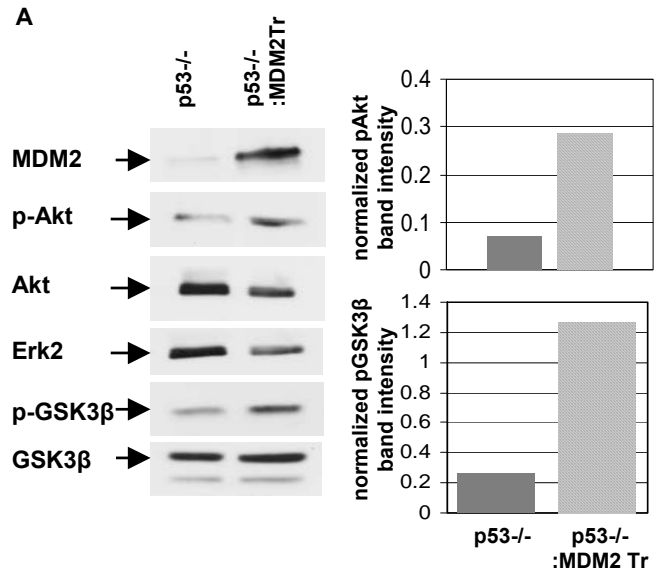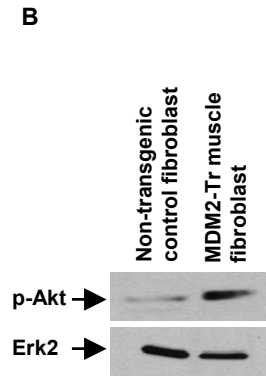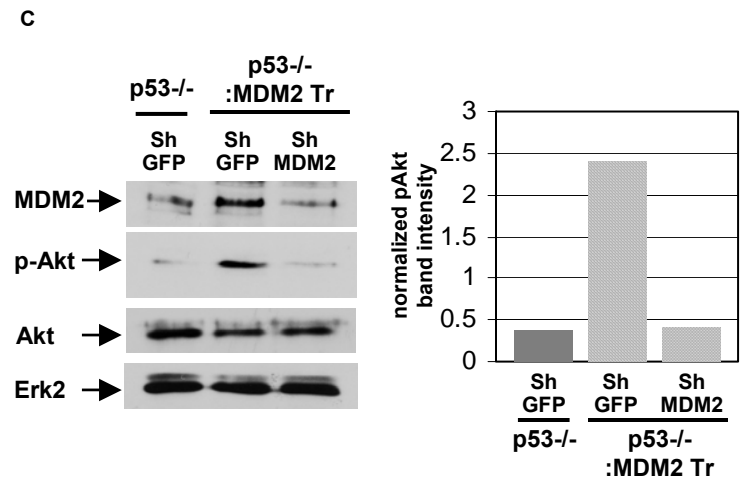

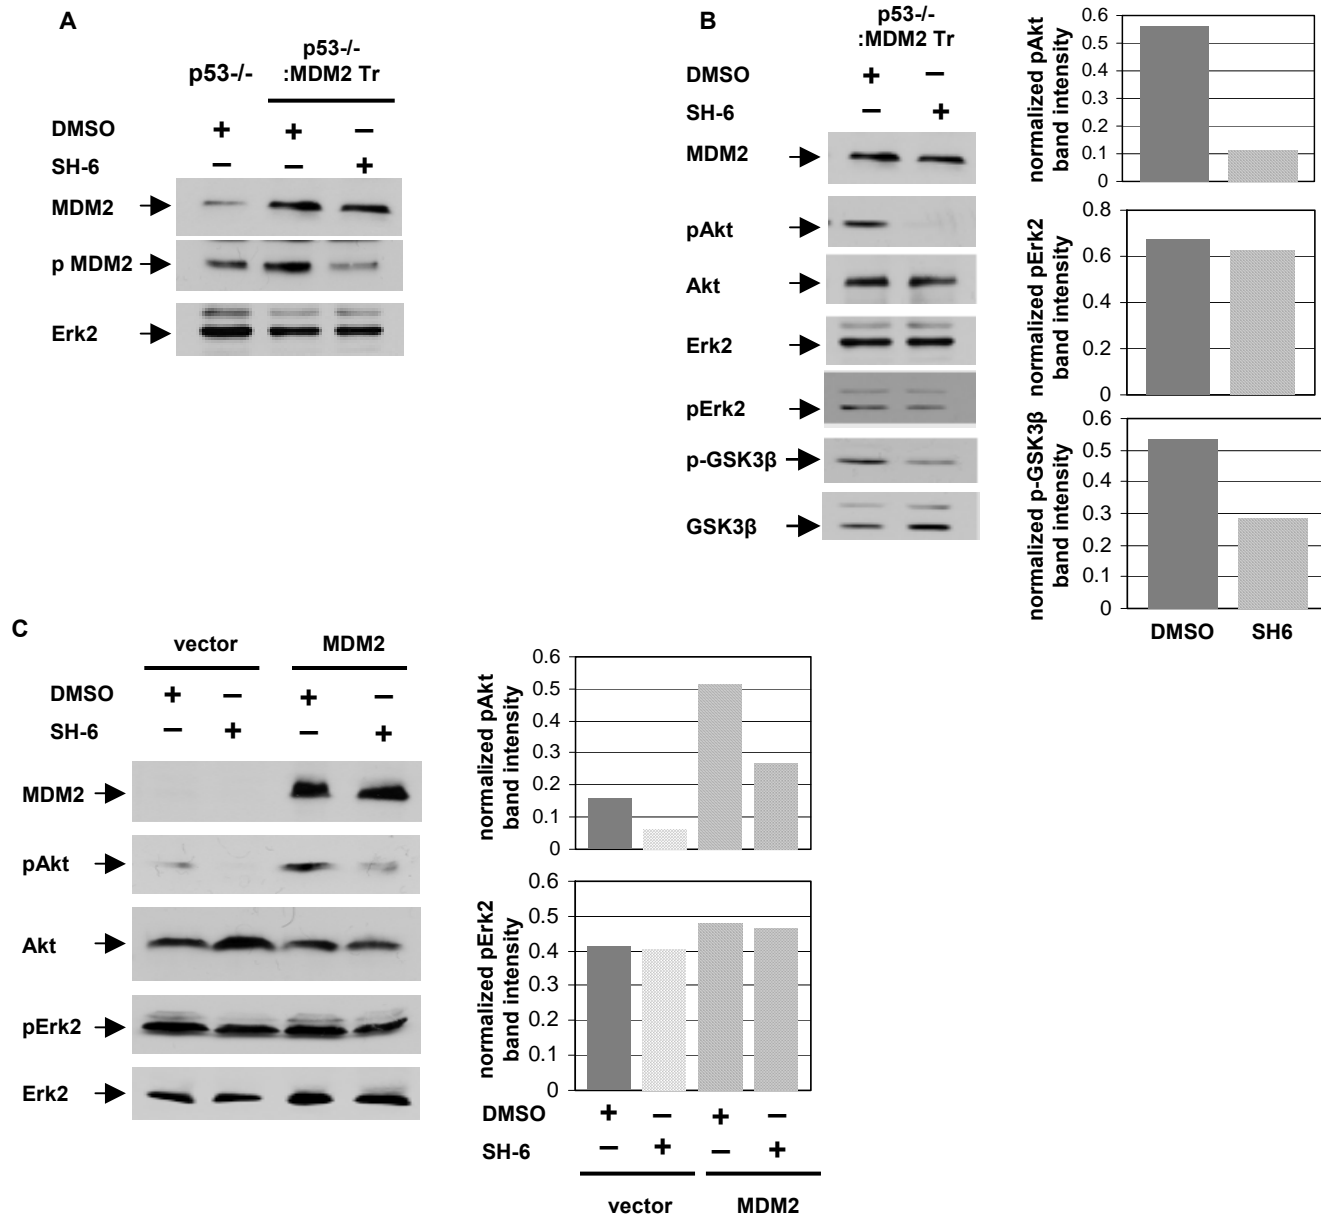

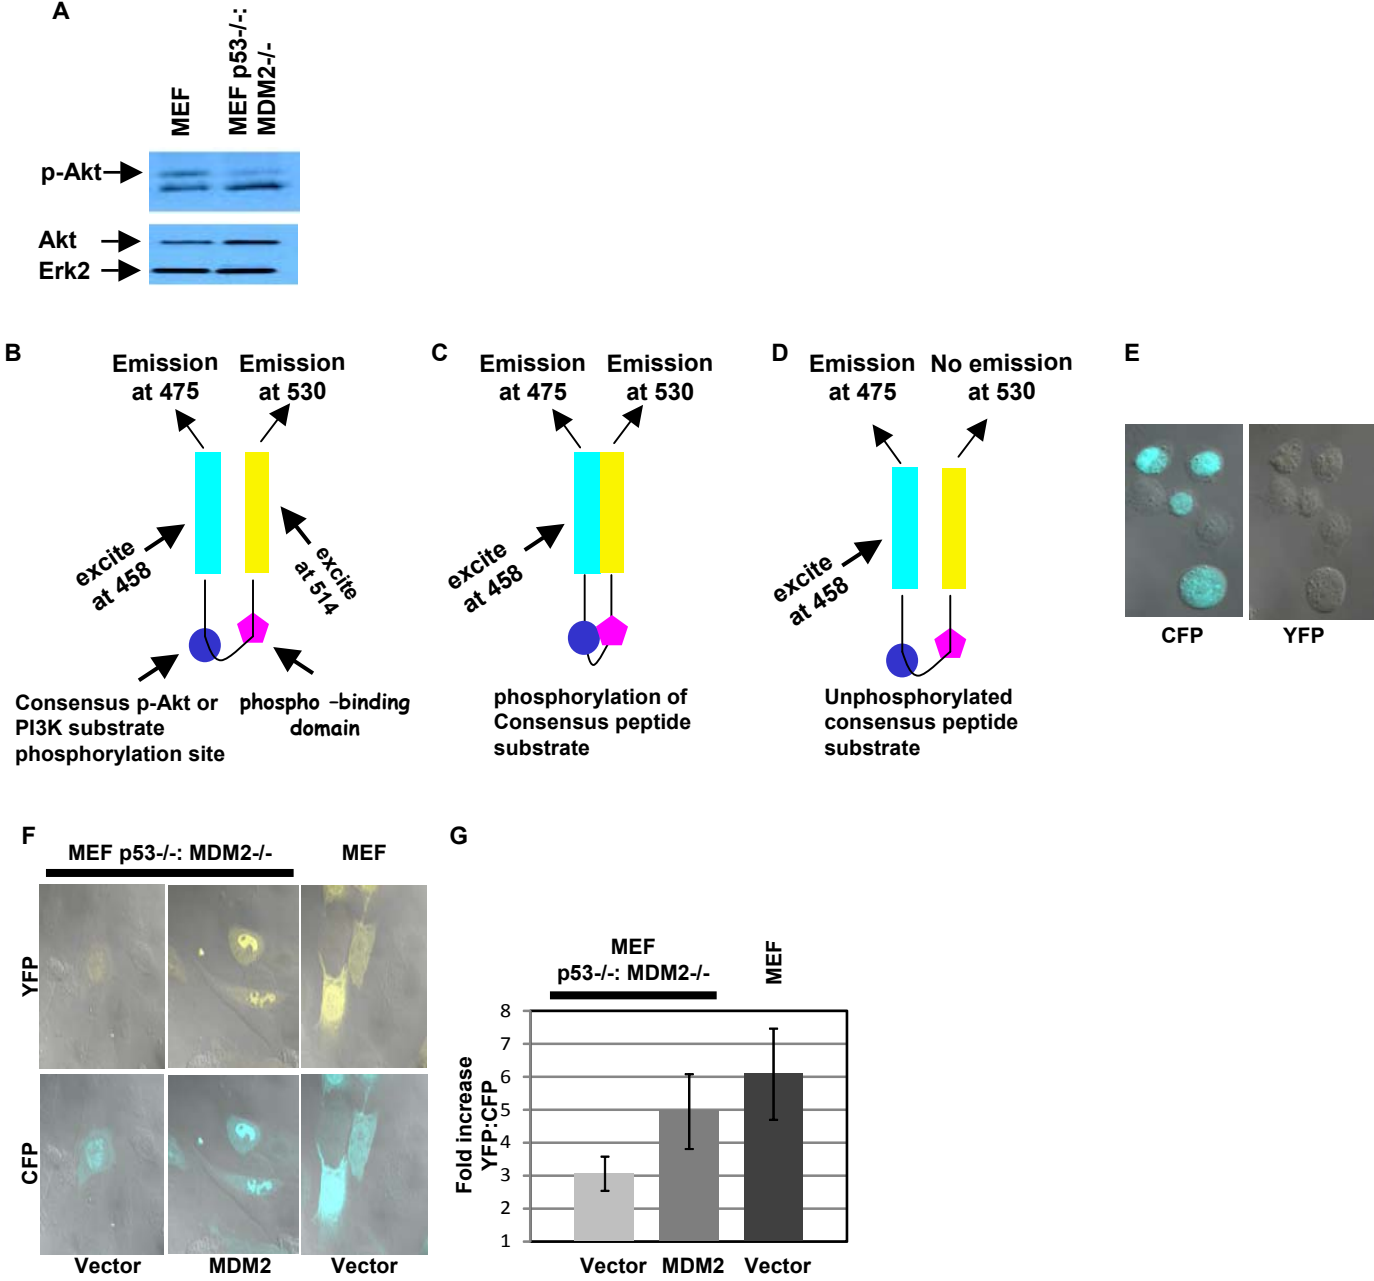

**A. Transient expression**

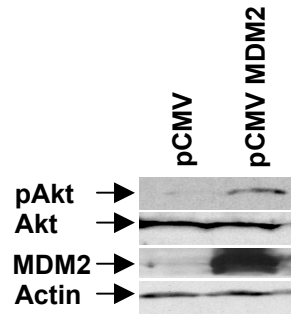

**B. Stable expression**

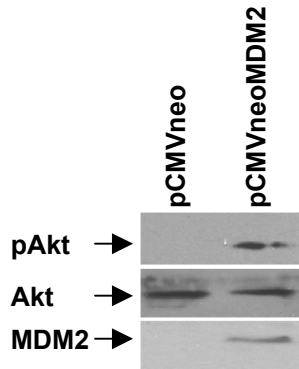

**C**

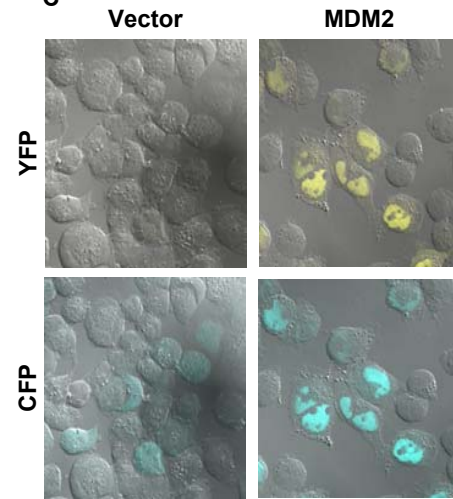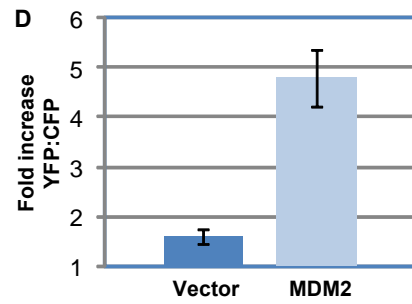

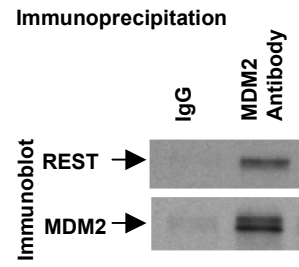

Supplementary Figure S6, Singh et al

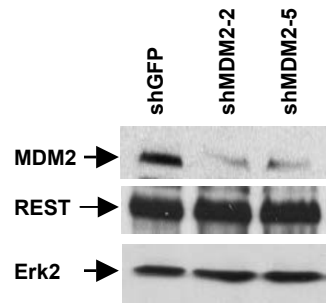

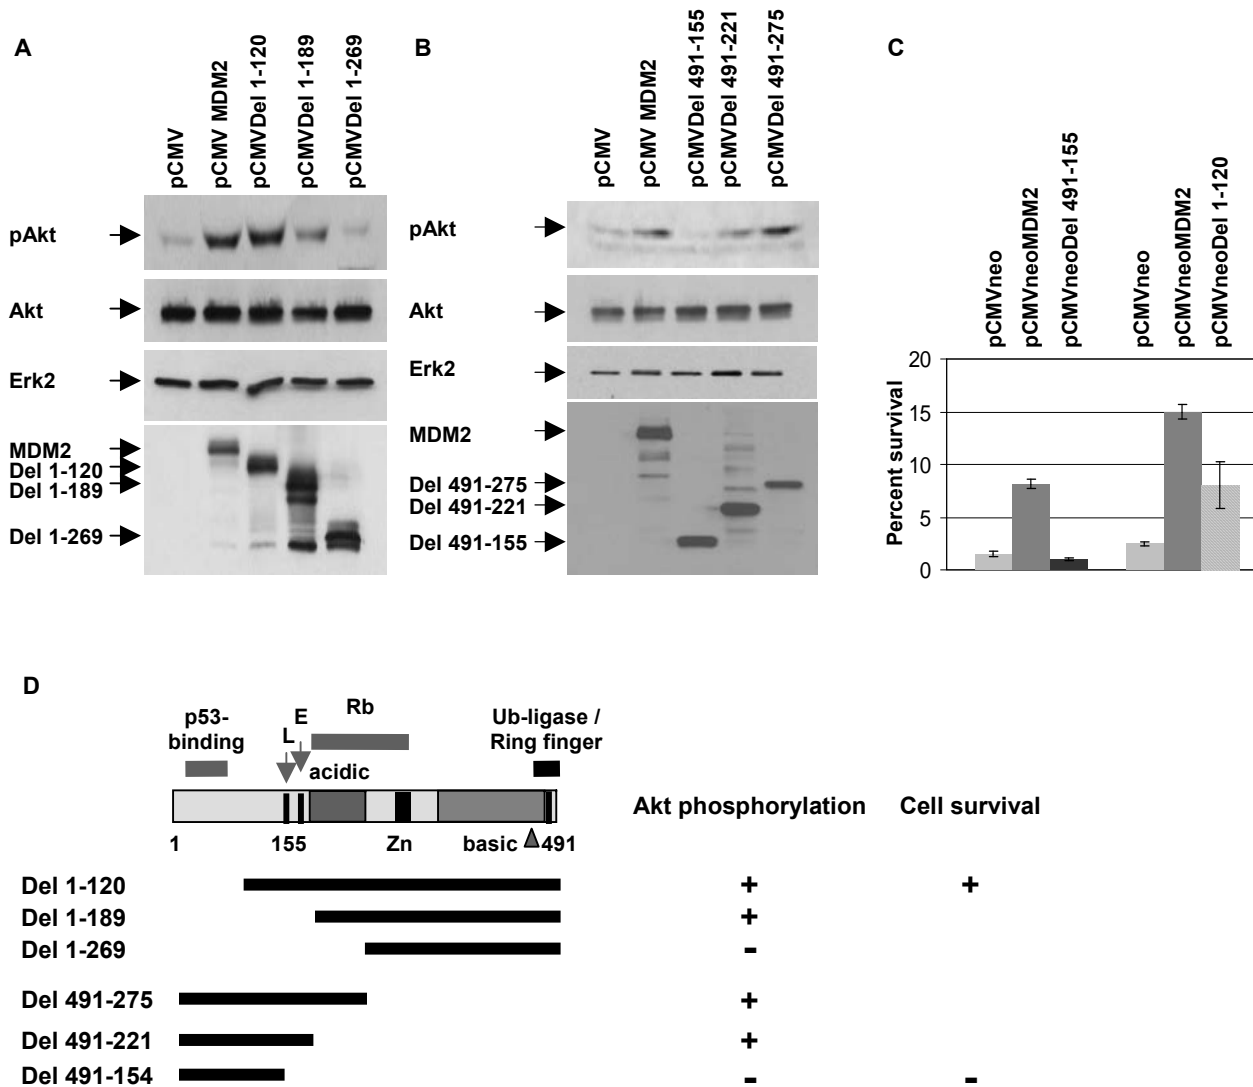

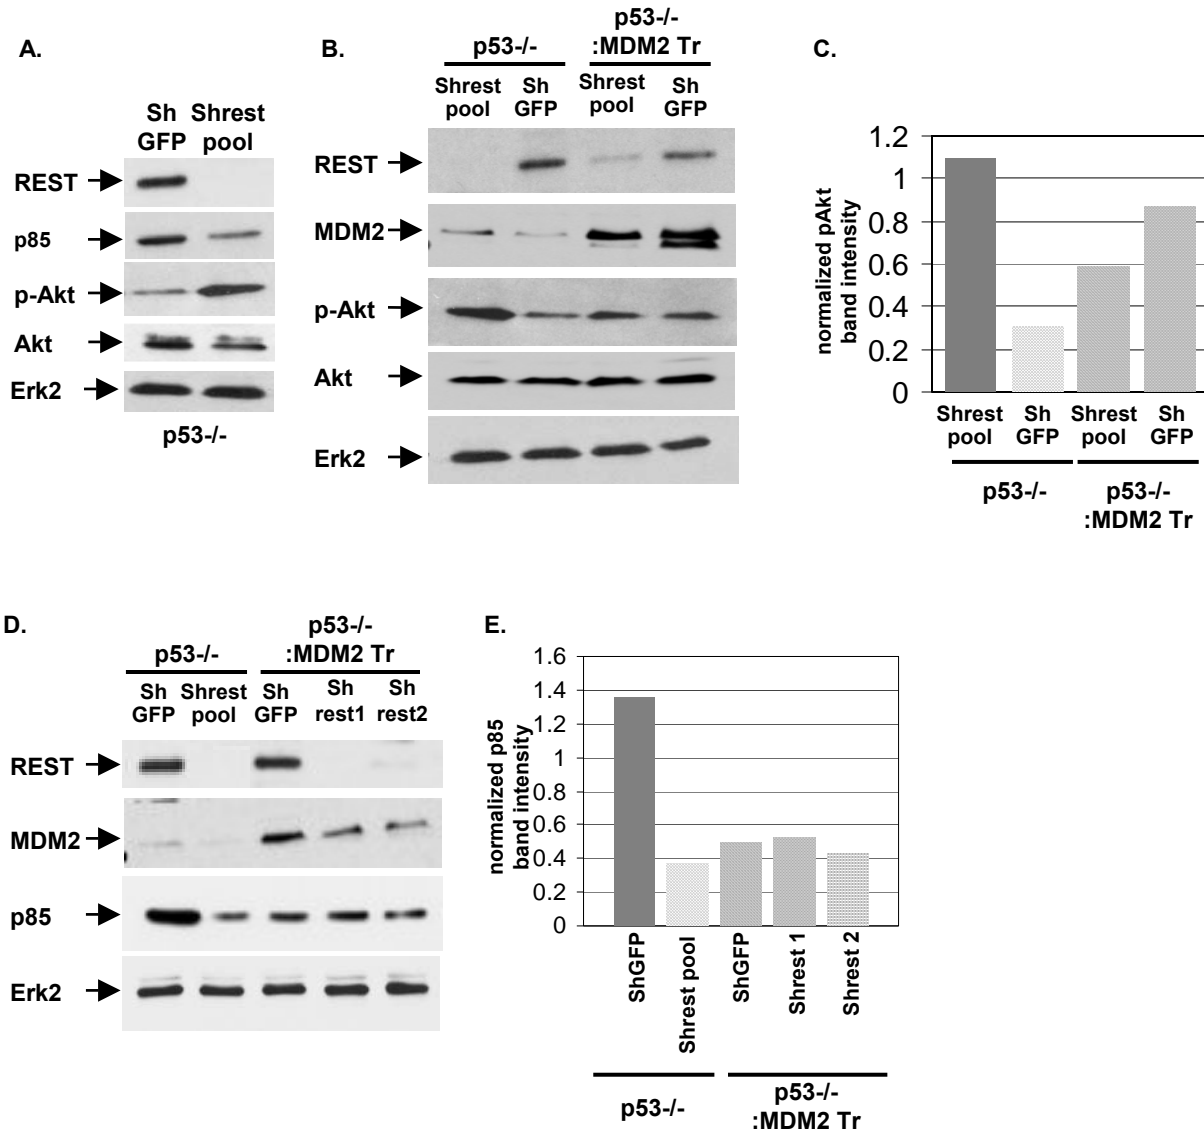



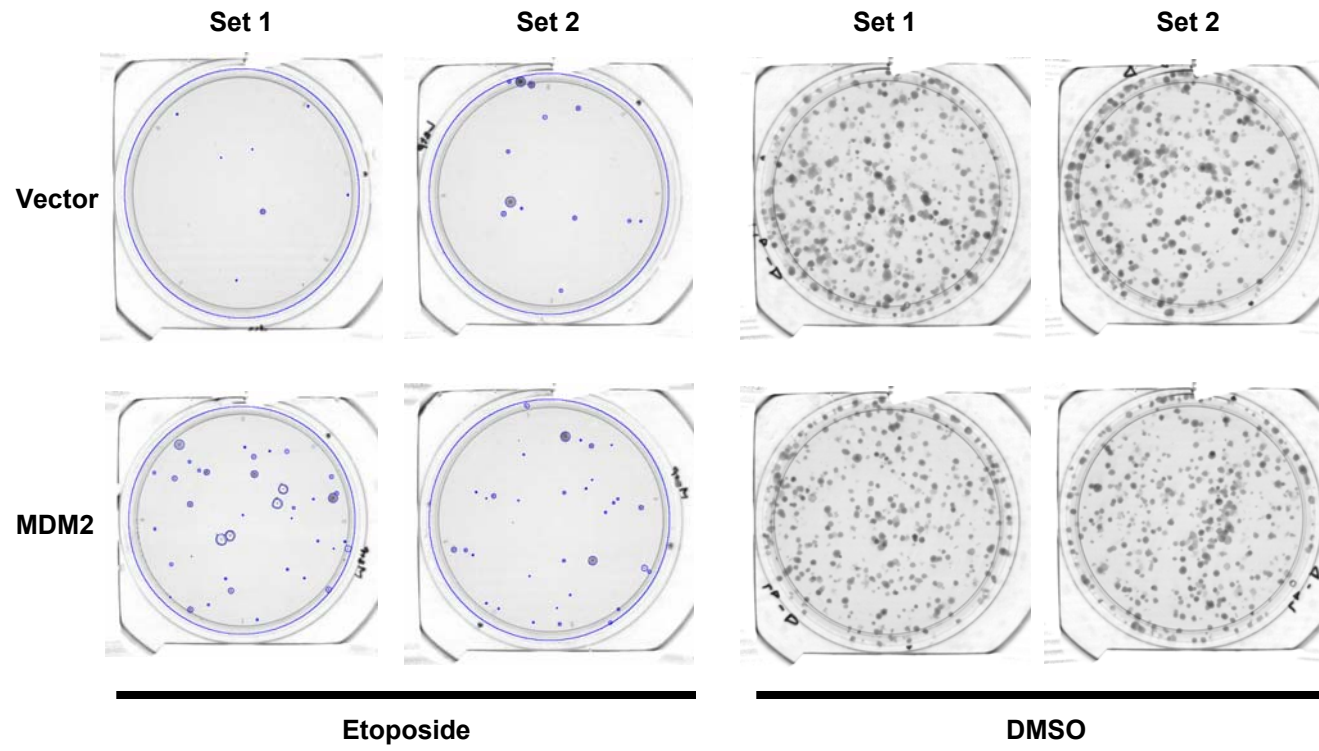

Supplement: cdd2012153x3.pdf [file cdd2012153x3.pdf]
